# Supplementary material
Source: PubMed Central journal article supplement (PMC2957763)
Supplement: 97320630004295S1.pdf [file 97320630004295S1.pdf]

**Supplementary material**

**Table 1:** Comparative characteristics of IDV and novel hit

| <b>Molecular properties</b> | <b>IDV</b>         | <b>Novel hit</b> |
|-----------------------------|--------------------|------------------|
| Atoms                       | 92                 | 63               |
| MW ( $\leq 500$ )           | 613.8 <sup>†</sup> | 494.6            |
| TPSA ( $\text{\AA}^2$ )     | 118                | 181              |
| cLogP ( $\leq 5$ )          | 2.9                | 2.4              |
| HBD ( $\leq 5$ )            | 4                  | 4                |
| HBA ( $\leq 10$ )           | 7                  | 6                |
| NI <sup>1</sup>             | 0                  | 0                |
| PI <sup>2</sup>             | 2                  | 3                |
| <b>Docking results</b>      |                    |                  |
| MolDock Score               | -                  | -185.7           |
| Rerank Score                | -                  | -148.5           |
| Docking Score               | -                  | -191.6           |
| H-bond energy               | -                  | -12.8            |
| Flexible torsions           | -                  | 8                |
| Energy Minimum              | -15.1              | -13.8            |
| <b>ADME/Tox</b>             |                    |                  |
| Cramer rules                | Class 3            | Class 3          |
| Biodegradability            | Class 2            | Class 2          |
| Carcinogenicity             | no                 | no               |

<sup>†</sup>negative ionizable groups; <sup>2</sup>positive ionizable groups
